# Supplementary material for: ESPRIT with multiple-angle subarray beamforming
Source: Springer Nature journal article supplement (doi:10.1186/1687-6180-2012-152), 2012-07-20

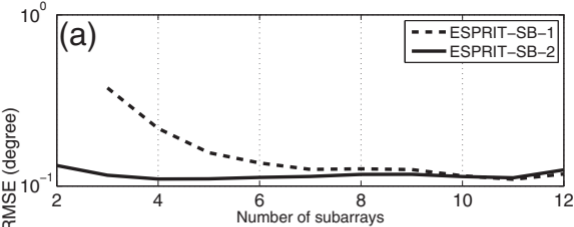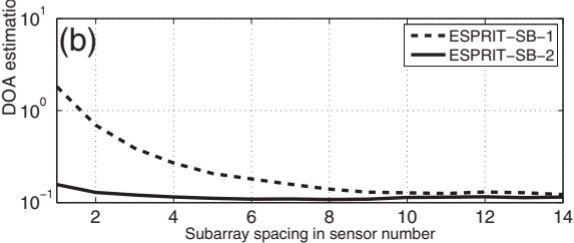

Supplement: 13634_2011_316_MOESM5_ESM.pdf [file 13634_2011_316_MOESM5_ESM.pdf]
